# Supplementary material
Source: Research Square preprint supplement (doi:10.21203/rs.3.rs-9244440/v1)
Supplement: Supplementary file 1 [file 6b1743e5c6d764f8b7049747.docx]

**Table S1 Supplemental Table S1.** **Supplementary Table S1. Differentially expressed genes in ischemic stroke patients vs. controls (RNA-seq)**

| Log2FC | AveExpr | t | P.Value | adj.P.Val | Gene | Group |
| --- | --- | --- | --- | --- | --- | --- |
| 0.82526067 | 2.79579005 | 10.2748785 | 1.10E-18 | 2.52E-14 | MBOAT2 | Up |
| -0.9925097 | -2.7964646 | -8.8566082 | 3.97E-15 | 4.54E-11 | BC048132 | Down |
| 0.85679378 | 3.37201987 | 8.67077524 | 1.14E-14 | 8.68E-11 | TOPORS-AS1 | Up |
| 0.85170197 | 4.15065694 | 8.20237243 | 1.58E-13 | 5.16E-10 | SLC22A4 | Up |
| 0.58851203 | 2.46738768 | 8.14829309 | 2.13E-13 | 6.10E-10 | ADCY4 | Up |
| -0.9130128 | -2.3984663 | -8.0652838 | 3.38E-13 | 7.01E-10 | RPF1 | Down |
| -0.8388449 | 1.48473306 | -8.049868 | 3.68E-13 | 7.01E-10 | XRCC2 | Down |
| 1.01237285 | 3.14540582 | 8.0004708 | 4.83E-13 | 7.97E-10 | KCNJ15 | Up |
| -0.6677869 | -2.6559383 | -7.795583 | 1.49E-12 | 2.27E-09 | LOC93463 | Down |
| -0.9160915 | -1.6738616 | -7.7586418 | 1.82E-12 | 2.61E-09 | LOC100996760 | Down |
| 0.60147335 | 3.91639343 | 7.73836354 | 2.04E-12 | 2.74E-09 | CPQ | Up |
| -0.7593491 | -1.6444208 | -7.5890626 | 4.59E-12 | 5.31E-09 | PPFIBP1 | Down |
| -0.6843629 | -1.8479862 | -7.5752461 | 4.95E-12 | 5.31E-09 | BC037214 | Down |
| 0.99111041 | 1.59248093 | 7.48823508 | 7.92E-12 | 7.49E-09 | SLC26A8 | Up |
| -0.8397864 | -1.7949029 | -7.4232996 | 1.12E-11 | 9.18E-09 | RP11-319G9.3 | Down |
| -0.6770612 | 1.57733653 | -7.4012617 | 1.26E-11 | 9.98E-09 | ID3 | Down |
| 0.7670841 | 4.58986368 | 7.36490407 | 1.54E-11 | 1.17E-08 | CLEC4E | Up |
| 0.94143479 | 0.77449538 | 7.19838698 | 3.74E-11 | 2.38E-08 | BMX | Up |
| -0.7426789 | -0.8585188 | -7.1712325 | 4.31E-11 | 2.53E-08 | RP11-69I8.2 | Down |
| 0.9658194 | 3.71604794 | 7.15724475 | 4.65E-11 | 2.59E-08 | CLEC4D | Up |
| 0.62926786 | 3.58558996 | 7.12616891 | 5.48E-11 | 2.98E-08 | STK17B | Up |
| -0.8915849 | -2.2261135 | -7.0548927 | 7.98E-11 | 3.80E-08 | POM121L9P | Down |
| 0.78992638 | -0.3197837 | 7.0453297 | 8.39E-11 | 3.92E-08 | C8orf88 | Up |
| 0.72399927 | 4.86972841 | 6.99957373 | 1.07E-10 | 4.71E-08 | SLC2A14 | Up |
| -0.6618225 | 1.4354967 | -6.9988925 | 1.07E-10 | 4.71E-08 | UBE2S | Down |
| 0.69224778 | 3.07193685 | 6.87165852 | 2.08E-10 | 7.56E-08 | IRAK3 | Up |
| -0.7809946 | -2.0363366 | -6.8533508 | 2.29E-10 | 8.18E-08 | GADL1 | Down |
| -0.5925954 | -2.0745269 | -6.8140575 | 2.81E-10 | 9.58E-08 | LINC00883 | Down |
| 0.97399539 | 6.08770429 | 6.79896234 | 3.04E-10 | 1.01E-07 | BCL2A1 | Up |
| 0.61422955 | -0.3220143 | 6.76713095 | 3.58E-10 | 1.15E-07 | DLGAP1-AS2 | Up |
| 0.74262789 | 3.7167998 | 6.76275695 | 3.66E-10 | 1.15E-07 | CKAP4 | Up |
| 0.77389191 | 0.70096391 | 6.74431259 | 4.03E-10 | 1.23E-07 | SLC22A1 | Up |
| -0.7263494 | -2.253053 | -6.7189346 | 4.59E-10 | 1.30E-07 | PRO1804 | Down |
| 0.72596521 | 3.89885487 | 6.7120694 | 4.75E-10 | 1.33E-07 | LRG1 | Up |
| 0.70793452 | 5.41638825 | 6.70434474 | 4.95E-10 | 1.36E-07 | NFIL3 | Up |
| 1.35160881 | -0.6615176 | 6.67076403 | 5.88E-10 | 1.46E-07 | OLAH | Up |
| 0.60454593 | 1.85990444 | 6.64082173 | 6.85E-10 | 1.65E-07 | PAQR6 | Up |
| -0.6329227 | -2.3241556 | -6.6386636 | 6.93E-10 | 1.65E-07 | MPPED2 | Down |
| 0.67471977 | 5.17289523 | 6.62261277 | 7.52E-10 | 1.69E-07 | SLC2A3 | Up |
| 0.64961677 | 0.99313071 | 6.60570182 | 8.20E-10 | 1.82E-07 | RP11-330O11.3 | Up |
| 0.65319387 | 3.80893246 | 6.57613665 | 9.54E-10 | 2.06E-07 | AKIRIN2 | Up |
| 0.70125247 | 2.6368269 | 6.5690482 | 9.89E-10 | 2.12E-07 | SNORD89 | Up |
| -0.7736111 | -2.6732081 | -6.5450967 | 1.12E-09 | 2.37E-07 | HMGB1P17 | Down |
| 0.81620361 | 1.315027 | 6.54335969 | 1.13E-09 | 2.37E-07 | GRB10 | Up |
| -0.5910618 | -1.8234524 | -6.5382047 | 1.16E-09 | 2.39E-07 | BC043266 | Down |
| -0.5936932 | -1.9866808 | -6.5044185 | 1.37E-09 | 2.72E-07 | ACTR3BP2 | Down |
| 0.73931997 | 2.55000135 | 6.49765555 | 1.42E-09 | 2.78E-07 | SIPA1L2 | Up |
| 0.62322527 | 1.35201955 | 6.48279335 | 1.53E-09 | 2.97E-07 | LOC100506100 | Up |
| -1.0642194 | -1.1558255 | -6.4633383 | 1.69E-09 | 3.23E-07 | AP000525.9 | Down |
| 0.76839914 | 0.64959402 | 6.4369855 | 1.93E-09 | 3.48E-07 | HECW2 | Up |
| 0.98362084 | 0.30446778 | 6.43681524 | 1.93E-09 | 3.48E-07 | INSC | Up |
| 1.03742579 | 4.65647323 | 6.43380015 | 1.96E-09 | 3.51E-07 | MCEMP1 | Up |
| -0.8267088 | -1.8030208 | -6.3461335 | 3.05E-09 | 5.13E-07 | CT45A1 | Down |
| -0.6389915 | -2.2105039 | -6.3331027 | 3.26E-09 | 5.36E-07 | BC039319 | Down |
| 0.75387971 | 1.80129663 | 6.32550174 | 3.38E-09 | 5.53E-07 | AX746670 | Up |
| 0.78206369 | 4.14089177 | 6.30151252 | 3.82E-09 | 6.06E-07 | 1-Mar | Up |
| -0.6286581 | -2.5760944 | -6.2950482 | 3.94E-09 | 6.22E-07 | BC038194 | Down |
| -0.9901159 | -1.9043641 | -6.2764924 | 4.32E-09 | 6.68E-07 | LPAR4 | Down |
| -0.7000732 | -1.6349546 | -6.2712266 | 4.44E-09 | 6.75E-07 | ALDOAP2 | Down |
| 0.93977592 | 3.6402207 | 6.2578066 | 4.74E-09 | 7.05E-07 | ANXA3 | Up |
| -0.5920165 | -2.2024356 | -6.2474707 | 4.99E-09 | 7.37E-07 | AGBL3 | Down |
| 0.83673985 | 0.2388635 | 6.18171862 | 6.92E-09 | 9.65E-07 | ARG1 | Up |
| 0.73122314 | -0.9468361 | 6.11803977 | 9.47E-09 | 1.22E-06 | HIST1H4D | Up |
| -0.8005517 | -1.6482289 | -6.0890738 | 1.09E-08 | 1.34E-06 | UBE3D | Down |
| 0.65872277 | 3.56342156 | 6.08200041 | 1.13E-08 | 1.35E-06 | F5 | Up |
| 0.58784154 | 3.68458224 | 6.07956757 | 1.14E-08 | 1.35E-06 | CPD | Up |
| -0.5912529 | -2.2849607 | -6.0693305 | 1.20E-08 | 1.39E-06 | MIR3610 | Down |
| 0.63496354 | 2.50255533 | 6.0659039 | 1.22E-08 | 1.39E-06 | PRRG4 | Up |
| -0.5972952 | 0.57706717 | -6.0593819 | 1.26E-08 | 1.42E-06 | LCN10 | Down |
| -0.8027471 | -0.7151902 | -6.0447527 | 1.36E-08 | 1.51E-06 | TIMM8A | Down |
| 0.59366883 | 2.59116068 | 6.02588755 | 1.49E-08 | 1.61E-06 | RC3H1 | Up |
| 1.06926976 | 1.61695791 | 6.01721213 | 1.55E-08 | 1.66E-06 | VSIG4 | Up |
| 0.74452586 | 1.31643048 | 6.01530435 | 1.57E-08 | 1.67E-06 | RP11-6I2.3 | Up |
| -0.6757756 | -0.335272 | -5.9910137 | 1.76E-08 | 1.79E-06 | BC022892 | Down |
| 0.7981336 | 2.11517433 | 5.99054152 | 1.77E-08 | 1.79E-06 | CLEC5A | Up |
| -0.9330289 | -1.1124036 | -5.9848869 | 1.82E-08 | 1.82E-06 | C9orf38 | Down |
| -0.7250738 | -2.3258034 | -5.9712522 | 1.94E-08 | 1.94E-06 | SHOX | Down |
| -0.8019373 | -2.3327946 | -5.9468557 | 2.18E-08 | 2.15E-06 | LECT2 | Down |
| 0.70660981 | 0.35721002 | 5.85309181 | 3.43E-08 | 3.02E-06 | RP11-456P18.2 | Up |
| -0.6148442 | -2.3340968 | -5.8413136 | 3.63E-08 | 3.13E-06 | NAG18 | Down |
| 0.65240208 | 5.47833141 | 5.82543979 | 3.92E-08 | 3.29E-06 | IL18RAP | Up |
| 0.81792598 | 2.84105336 | 5.82333013 | 3.96E-08 | 3.30E-06 | COX7BP1 | Up |
| 0.98255846 | 0.58069498 | 5.81693945 | 4.08E-08 | 3.37E-06 | HTRA1 | Up |
| -0.5962193 | 0.92321931 | -5.8156176 | 4.11E-08 | 3.37E-06 | SPIB | Down |
| 0.82793864 | -1.7591215 | 5.80788054 | 4.27E-08 | 3.47E-06 | HMP19 | Up |
| 0.63648123 | 2.82257419 | 5.79996464 | 4.43E-08 | 3.55E-06 | PRDM1 | Up |
| -0.6492382 | 0.9949819 | -5.7826279 | 4.81E-08 | 3.77E-06 | LINC00342 | Down |
| 0.75521226 | 1.09496915 | 5.77072859 | 5.09E-08 | 3.94E-06 | GALNT14 | Up |
| 0.74073053 | -2.0109419 | 5.73003269 | 6.18E-08 | 4.50E-06 | DDIT4L | Up |
| -0.7139931 | -2.519708 | -5.7283155 | 6.23E-08 | 4.53E-06 | CCDC144CP | Down |
| -0.6361852 | 1.90833512 | -5.7255675 | 6.31E-08 | 4.57E-06 | TNFRSF25 | Down |
| -0.6062588 | -2.0422775 | -5.6963155 | 7.25E-08 | 5.13E-06 | LOC100507073 | Down |
| 0.61336204 | 3.143249 | 5.66903187 | 8.25E-08 | 5.67E-06 | HNRNPL | Up |
| 0.66501228 | 2.23215242 | 5.65978175 | 8.62E-08 | 5.82E-06 | ERN1 | Up |
| 0.63147873 | 5.57747079 | 5.64354305 | 9.30E-08 | 6.12E-06 | PFKFB3 | Up |
| -0.7445029 | 0.31259356 | -5.630626 | 9.89E-08 | 6.41E-06 | GAS6-AS1 | Down |
| -0.5992073 | 1.41979684 | -5.6227645 | 1.03E-07 | 6.59E-06 | MLC1 | Down |
| 0.80358509 | 1.14109973 | 5.62034304 | 1.04E-07 | 6.65E-06 | LINC01270 | Up |
| 0.58936416 | 2.27005189 | 5.61895768 | 1.04E-07 | 6.67E-06 | TMEM88 | Up |
| -0.6488389 | -1.3954532 | -5.6112061 | 1.08E-07 | 6.84E-06 | LOC100129917 | Down |
| -1.0841553 | -1.3972758 | -5.5941563 | 1.17E-07 | 7.22E-06 | BC017398 | Down |
| 0.68615666 | 0.85510585 | 5.59083942 | 1.19E-07 | 7.31E-06 | HIST1H4H | Up |
| -0.6097148 | -2.8374596 | -5.5806383 | 1.25E-07 | 7.58E-06 | LOC101927988 | Down |
| 0.63326492 | 5.64452845 | 5.54353799 | 1.49E-07 | 8.72E-06 | VCAN | Up |
| -0.7678562 | 1.50967654 | -5.5341662 | 1.55E-07 | 8.95E-06 | CLIC3 | Down |
| 0.68106902 | 3.67249261 | 5.52862976 | 1.59E-07 | 9.07E-06 | SAMSN1 | Up |
| 0.82680321 | 3.196212 | 5.52842529 | 1.59E-07 | 9.07E-06 | EGR1 | Up |
| 0.59802302 | 0.95907783 | 5.52505228 | 1.62E-07 | 9.13E-06 | VMA21 | Up |
| 0.82508887 | 0.98394555 | 5.52104531 | 1.65E-07 | 9.23E-06 | LOC731424 | Up |
| 0.85776561 | -0.430588 | 5.49204296 | 1.89E-07 | 1.03E-05 | AC079305.10 | Up |
| -0.6702703 | -1.5045789 | -5.4821152 | 1.98E-07 | 1.08E-05 | ZNF566 | Down |
| 0.92270574 | 2.47727018 | 5.46781935 | 2.11E-07 | 1.14E-05 | G0S2 | Up |
| 0.59895995 | 5.17274304 | 5.46165375 | 2.17E-07 | 1.16E-05 | LOC100129518 | Up |
| 0.91156159 | 3.98121193 | 5.42153089 | 2.61E-07 | 1.32E-05 | MMP9 | Up |
| 0.83153818 | 3.53994563 | 5.42147556 | 2.61E-07 | 1.32E-05 | TNFAIP6 | Up |
| 0.61477996 | 1.04905481 | 5.40473212 | 2.82E-07 | 1.40E-05 | LOC100289061 | Up |
| 0.64485613 | 2.36989002 | 5.38309716 | 3.12E-07 | 1.51E-05 | PRO2852 | Up |
| 0.60607296 | 3.00170083 | 5.38093272 | 3.15E-07 | 1.51E-05 | BCL2L2-PABPN1 | Up |
| 0.65142326 | 0.6200689 | 5.35749962 | 3.51E-07 | 1.64E-05 | ANKRD50 | Up |
| -0.5915642 | 1.50150254 | -5.3412421 | 3.78E-07 | 1.72E-05 | CD72 | Down |
| 0.65473712 | 3.70833844 | 5.33397621 | 3.90E-07 | 1.77E-05 | TLR5 | Up |
| 0.80752067 | 0.604434 | 5.33328202 | 3.92E-07 | 1.77E-05 | BCL10 | Up |
| 0.79816519 | -1.3216156 | 5.32538212 | 4.06E-07 | 1.81E-05 | PRL | Up |
| 0.6702687 | 2.98094241 | 5.32516294 | 4.06E-07 | 1.81E-05 | FFAR2 | Up |
| -0.7023249 | 1.74957361 | -5.3184778 | 4.19E-07 | 1.85E-05 | CD19 | Down |
| 0.5979471 | 0.93670502 | 5.30208024 | 4.51E-07 | 1.95E-05 | IL1R1 | Up |
| -0.7795919 | -0.9935139 | -5.2722019 | 5.17E-07 | 2.16E-05 | GAGE1 | Down |
| 0.67484049 | 4.07236789 | 5.27084186 | 5.20E-07 | 2.17E-05 | SLPI | Up |
| 0.59895797 | -0.7997283 | 5.21695843 | 6.63E-07 | 2.67E-05 | LOC101927057 | Up |
| 0.6097132 | 3.13741425 | 5.21164591 | 6.79E-07 | 2.72E-05 | NME8 | Up |
| 0.63498636 | 2.95495798 | 5.20831783 | 6.89E-07 | 2.74E-05 | PGLYRP1 | Up |
| 0.63725137 | 3.11021857 | 5.1921681 | 7.41E-07 | 2.87E-05 | LOC100996756 | Up |
| 0.8397037 | -0.7551627 | 5.1526183 | 8.84E-07 | 3.23E-05 | SEMG1 | Up |
| -0.5987741 | -1.179458 | -5.0974152 | 1.13E-06 | 3.89E-05 | FREM3 | Down |
| 0.62043957 | 0.43225579 | 5.06257519 | 1.32E-06 | 4.38E-05 | ST6GALNAC3 | Up |
| 0.74936769 | 2.54384453 | 5.03395344 | 1.50E-06 | 4.86E-05 | CASP5 | Up |
| 0.72218359 | -1.2928835 | 5.02905112 | 1.53E-06 | 4.92E-05 | RP11-111K18.2 | Up |
| 0.88990226 | 0.68514287 | 5.0057847 | 1.69E-06 | 5.32E-05 | CNTNAP3 | Up |
| 0.67366361 | 2.32814263 | 4.98474065 | 1.86E-06 | 5.74E-05 | RP11-373D23.2 | Up |
| -0.6306072 | 2.77495931 | -4.9785654 | 1.91E-06 | 5.85E-05 | ANKRD36B | Down |
| 0.92030775 | 3.16763198 | 4.97509001 | 1.94E-06 | 5.91E-05 | PTGS2 | Up |
| 0.60574725 | 0.77135861 | 4.94420172 | 2.21E-06 | 6.58E-05 | FCAR | Up |
| 0.60459474 | -0.2675322 | 4.91832567 | 2.48E-06 | 7.21E-05 | LOC101929007 | Up |
| 0.75992788 | 3.108435 | 4.90824223 | 2.59E-06 | 7.46E-05 | RPL22L1 | Up |
| 0.58830244 | 1.54013699 | 4.86308162 | 3.15E-06 | 8.72E-05 | LINC00282 | Up |
| -0.7172705 | 1.29950152 | -4.8618364 | 3.16E-06 | 8.75E-05 | ZNF439 | Down |
| 0.71690403 | 1.80785858 | 4.84716096 | 3.37E-06 | 9.20E-05 | TPST1 | Up |
| 0.59360141 | -0.8763242 | 4.68610609 | 6.68E-06 | 0.00015332 | ZNF608 | Up |
| -0.6710935 | 3.27321226 | -4.674519 | 7.01E-06 | 0.00015879 | TCL1A | Down |
| 0.80170978 | 1.5279446 | 4.66985132 | 7.15E-06 | 0.0001605 | ANKRD22 | Up |
| -0.6452715 | -0.3877153 | -4.6280418 | 8.51E-06 | 0.00018541 | COL5A3 | Down |
| -0.7018323 | -1.6840752 | -4.6168257 | 8.92E-06 | 0.00019219 | LOC100130458 | Down |
| 0.77010945 | 1.56306617 | 4.59211158 | 9.89E-06 | 0.00020731 | GPR84 | Up |
| -0.7331578 | -1.540823 | -4.5421977 | 1.22E-05 | 0.00024506 | FCRL5 | Down |
| 0.62546292 | 2.15720904 | 4.52087337 | 1.33E-05 | 0.00026339 | TCN1 | Up |
| -0.782439 | -0.8101484 | -4.4575287 | 1.72E-05 | 0.00032065 | ZNF404 | Down |
| 0.6060266 | 4.59767503 | 4.43921706 | 1.85E-05 | 0.00033905 | FKBP5 | Up |
| -0.626318 | -1.4249963 | -4.3887575 | 2.27E-05 | 0.00039456 | GAGE12B | Down |
| 0.72370101 | -0.137371 | 4.34459638 | 2.71E-05 | 0.0004568 | ERVK3-2 | Up |
| -0.8290905 | -0.3004956 | -4.3232785 | 2.95E-05 | 0.00048839 | DQ592442 | Down |
| 1.04640439 | 1.44788316 | 4.31684851 | 3.03E-05 | 0.00049815 | CD177 | Up |
| 0.60951828 | -0.5267914 | 4.2380475 | 4.13E-05 | 0.00063643 | C1QC | Up |
| 0.60060595 | -0.0925114 | 4.20408426 | 4.72E-05 | 0.00070755 | C9orf84 | Up |
| 0.64518828 | -0.6001422 | 4.18405479 | 5.11E-05 | 0.00074936 | RP11-476D10.1 | Up |
| 0.6399502 | 2.76410036 | 4.18016315 | 5.18E-05 | 0.00075887 | CXCL1 | Up |
| -0.7319053 | -1.5379779 | -4.1737386 | 5.32E-05 | 0.00077218 | ZNF415 | Down |
| -0.5870568 | 1.59848442 | -4.1213925 | 6.51E-05 | 0.00090392 | LOC200772 | Down |
| 0.61099544 | 2.31526892 | 4.03068918 | 9.21E-05 | 0.00117501 | ECRP | Up |
| 0.63996109 | -1.1226133 | 4.0142806 | 9.80E-05 | 0.00122922 | MAOA | Up |
| 0.62977014 | 2.73036856 | 3.99828443 | 0.00010416 | 0.00127652 | TGFBR3 | Up |
| 0.66185012 | 1.92648699 | 3.85213604 | 0.00017965 | 0.00191533 | YOD1 | Up |
| -0.6422598 | 0.02036441 | -3.8356962 | 0.00019083 | 0.00199739 | RP11-395I6.3 | Down |
| 0.93684981 | 2.87238074 | 3.83087986 | 0.00019424 | 0.00202731 | BTNL8 | Up |
| 1.00149301 | -0.0927245 | 3.82136291 | 0.00020113 | 0.00208887 | FGF13 | Up |
| -0.6887932 | 2.11226015 | -3.8172329 | 0.00020419 | 0.00211397 | NOG | Down |
| 0.62280362 | -0.6881608 | 3.7644938 | 0.0002474 | 0.00244299 | RP11-382B18.4 | Up |
| 0.67172673 | 0.15560711 | 3.75781792 | 0.00025345 | 0.00248834 | THBS1 | Up |
| 0.84007512 | 0.86345668 | 3.75557135 | 0.00025551 | 0.00249602 | DAAM2 | Up |
| 0.86993352 | 3.71124518 | 3.71381679 | 0.00029697 | 0.00279966 | DEFA4 | Up |
| 0.79123357 | 1.24503753 | 3.69406799 | 0.00031873 | 0.00295129 | SERPINB2 | Up |
| 0.78788446 | -1.3060524 | 3.59381842 | 0.00045448 | 0.0039151 | LINC01093 | Up |
| 0.85665589 | -1.020095 | 3.55626706 | 0.00051815 | 0.00432673 | METTL7B | Up |
| 0.5913829 | 5.03622577 | 3.51855495 | 0.00059048 | 0.00479257 | CFD | Up |
| 0.59594105 | 5.36990248 | 3.47172869 | 0.00069354 | 0.00537178 | IL1B | Up |
| 0.67844201 | -1.0527683 | 3.35691114 | 0.00102219 | 0.00720286 | CNTNAP3P2 | Up |
| 0.60525519 | 2.23303322 | 3.30179962 | 0.00122726 | 0.00826361 | ECHDC3 | Up |
| 0.71963189 | 0.42181975 | 3.27706456 | 0.00133127 | 0.00877291 | CEACAM6 | Up |
| 0.64632027 | 0.59230868 | 3.20417438 | 0.00168757 | 0.01050083 | GYPA | Up |
| 0.65169377 | -0.0513272 | 3.1672175 | 0.00190038 | 0.0114483 | LOC102723918 | Up |
| 0.62718588 | 4.308676 | 3.09969235 | 0.00235482 | 0.0134932 | FOLR3 | Up |
| 0.61891842 | -0.4478502 | 3.02742027 | 0.00295124 | 0.0158174 | BEX1 | Up |
| 0.62049371 | 5.25085331 | 3.00857992 | 0.00312816 | 0.01649129 | S100P | Up |
| 0.69237237 | -0.6569851 | 2.82207064 | 0.00548726 | 0.02527143 | FAM132B | Up |
| 0.60234934 | 0.43725731 | 2.76794183 | 0.00642769 | 0.02833089 | LOC102724387 | Up |
| 0.65018809 | -1.5758617 | 2.71693906 | 0.00744563 | 0.03176506 | HEPACAM2 | Up |
| -0.790268 | 0.92311877 | -2.6956273 | 0.00791269 | 0.03330435 | BTNL3 | Down |

**Table S2. Genes expressed up in migraine patients**

| Gene name |
| --- |
| C19orf33 |
| HBEGF |
| SLPI |
| CMTM2 |
| S100P |
| TMEM52B |
| ID1 |
| PHLDA2 |
| CLEC4E |
| AREG |
| GOS2 |
| FFAR2 |
| CXCL1 |
| BCL2A1 |
| ADM |
| CXCL8 |
| EGR1 |
| CCL3L1 |
| CCL3L3 |
| DUSP1 |
| GADD45B |
| IER3 |
| SRGN |
| SAT1 |
| FFAR3 |
| F3 |
| OSR2 |
| PLAUR |
| CXCL2 |
| PPP1R15A |
| ZFP36 |
| CCL3 |
| NFKBIA |
| PTGS2 |
| NAMPT |
| NAMPTL |
| TNF |
| CCL4 |
| CCL4L2 |
| CCL4L1 |
| ADRA2B |
| TNFAIP6 |
| IL1RN |
| SNAI1 |
| CXCL3 |
| DUSP2 |
| PTX3 |
| SOD2 |
| EREG |
| CD83 |
| TNFAIP3 |
| IL1B |

**Table S3. Top 100 DisGeNET enriched entries for core genes**

| Term | P-value | Adjusted P-value | Old P-value | Old Adjusted P-value | Odds Ratio |
| --- | --- | --- | --- | --- | --- |
| Inflammation | 1.13E-10 | 2.56E-07 | 0 | 0 | 61.9635788 |
| Pancreatic carcinoma | 1.29E-09 | 1.46E-06 | 0 | 0 | 35.7746681 |
| Arteriosclerosis | 6.26E-09 | 2.60E-06 | 0 | 0 | 31.5717996 |
| Renal interstitial fibrosis | 6.88E-09 | 2.60E-06 | 0 | 0 | 266.08 |
| Periodontitis | 7.21E-09 | 2.60E-06 | 0 | 0 | 64.1396104 |
| Glioma | 7.80E-09 | 2.60E-06 | 0 | 0 | 29.6433333 |
| Atherosclerosis | 9.08E-09 | 2.60E-06 | 0 | 0 | 30.1776 |
| Endometriosis | 9.17E-09 | 2.60E-06 | 0 | 0 | 34.6288799 |
| Hyperglycemia | 1.46E-08 | 3.68E-06 | 0 | 0 | 40.5509356 |
| precancerous lesions | 2.21E-08 | 5.03E-06 | 0 | 0 | 86.872266 |
| Ureteral obstruction | 2.77E-08 | 5.60E-06 | 0 | 0 | 82.9281537 |
| Malignant neoplasm of pancreas | 3.10E-08 | 5.60E-06 | 0 | 0 | 24.7140523 |
| Systemic Scleroderma | 3.85E-08 | 5.60E-06 | 0 | 0 | 35.0108108 |
| Coronary heart disease | 4.30E-08 | 5.60E-06 | 0 | 0 | 28.1119705 |
| Ulcerative Colitis | 4.37E-08 | 5.60E-06 | 0 | 0 | 28.0470415 |
| Kaposi Sarcoma | 4.56E-08 | 5.60E-06 | 0 | 0 | 46.535489 |
| Malignant neoplasm of endometrium | 4.62E-08 | 5.60E-06 | 0 | 0 | 34.0631579 |
| Cachexia | 4.65E-08 | 5.60E-06 | 0 | 0 | 74.466967 |
| Uterine Corpus Cancer | 4.73E-08 | 5.60E-06 | 0 | 0 | 33.9405594 |
| Glioblastoma | 4.93E-08 | 5.60E-06 | 0 | 0 | 23.428905 |
| Complicated pneumoconiosis | 5.98E-08 | 6.47E-06 | 0 | 0 | 605.363636 |
| Fibromatosis, Aggressive | 6.69E-08 | 6.90E-06 | 0 | 0 | 144.952727 |
| Fibrosis | 7.64E-08 | 7.43E-06 | 0 | 0 | 67.1476965 |
| Adenocarcinoma of pancreas | 7.85E-08 | 7.43E-06 | 0 | 0 | 42.3232759 |
| Kidney Diseases | 9.28E-08 | 8.44E-06 | 0 | 0 | 30.6234177 |
| Tumor Progression | 1.03E-07 | 8.96E-06 | 0 | 0 | 21.5216346 |
| Gestational Diabetes | 1.12E-07 | 9.44E-06 | 0 | 0 | 126.495238 |
| Mesothelioma | 1.25E-07 | 1.01E-05 | 0 | 0 | 39.0099469 |
| Duodenal Ulcer | 1.42E-07 | 1.08E-05 | 0 | 0 | 118.919403 |
| Lung diseases | 1.46E-07 | 1.08E-05 | 0 | 0 | 37.9825581 |
| Ischemic stroke | 1.48E-07 | 1.08E-05 | 0 | 0 | 37.882732 |
| Ovarian Carcinoma | 1.70E-07 | 1.21E-05 | 0 | 0 | 20.2838577 |
| Restenosis | 2.54E-07 | 1.75E-05 | 0 | 0 | 52.3174603 |
| Angiolymphoid hyperplasia | 2.63E-07 | 1.76E-05 | 0 | 0 | 340.397727 |
| Fatty Liver | 2.95E-07 | 1.80E-05 | 0 | 0 | 33.5509153 |
| Carcinogenesis | 2.95E-07 | 1.80E-05 | 0 | 0 | 23.5869726 |
| Coronary Arteriosclerosis | 3.02E-07 | 1.80E-05 | 0 | 0 | 25.5418327 |
| Diabetic Neuropathies | 3.09E-07 | 1.80E-05 | 0 | 0 | 97.0926829 |
| Leukemia, Myelocytic, Acute | 3.11E-07 | 1.80E-05 | 0 | 0 | 19.4365998 |
| Pulmonary Emphysema | 3.18E-07 | 1.80E-05 | 0 | 0 | 49.9141414 |
| Cardiovascular Diseases | 3.83E-07 | 2.12E-05 | 0 | 0 | 24.6230769 |
| Sarcoidosis | 4.02E-07 | 2.12E-05 | 0 | 0 | 47.5108225 |
| Undifferentiated carcinoma | 4.11E-07 | 2.12E-05 | 0 | 0 | 47.3036398 |
| Diabetic Polyneuropathies | 4.17E-07 | 2.12E-05 | 0 | 0 | 286.607656 |
| Overweight | 4.20E-07 | 2.12E-05 | 0 | 0 | 47.0982356 |
| Elastosis perforans serpiginosa | 5.48E-07 | 2.68E-05 | 0 | 0 | 259.285714 |
| Secondary malignant neoplasm of lymph node | 5.54E-07 | 2.68E-05 | 0 | 0 | 19.7656374 |
| Alzheimer Disease, Late Onset | 5.68E-07 | 2.69E-05 | 0 | 0 | 44.2159498 |
| Endometrial Carcinoma | 5.96E-07 | 2.76E-05 | 0 | 0 | 22.9927971 |
| Myeloid Leukemia | 6.07E-07 | 2.76E-05 | 0 | 0 | 29.5318182 |
| Lymphoma | 6.86E-07 | 3.01E-05 | 0 | 0 | 19.1809084 |
| M5b Acute differentiated monocytic leukemia | 6.89E-07 | 3.01E-05 | 0 | 0 | 78.7524752 |
| Pancreatitis | 7.69E-07 | 3.30E-05 | 0 | 0 | 41.5025253 |
| Polycystic Ovary Syndrome | 8.07E-07 | 3.40E-05 | 0 | 0 | 28.0759615 |
| Cerebral Ischemia | 8.57E-07 | 3.54E-05 | 0 | 0 | 40.5679012 |
| Synovitis | 8.93E-07 | 3.62E-05 | 0 | 0 | 73.6222222 |
| Dermatomyositis | 9.59E-07 | 3.82E-05 | 0 | 0 | 72.2763636 |
| Fibrosis, Liver | 9.93E-07 | 3.89E-05 | 0 | 0 | 27.059833 |
| Obesity | 1.04E-06 | 4.01E-05 | 0 | 0 | 16.6297131 |
| Aortic Aneurysm, Abdominal | 1.08E-06 | 4.01E-05 | 0 | 0 | 38.6788378 |
| Anoxia | 1.08E-06 | 4.01E-05 | 0 | 0 | 38.6788378 |
| Acute Chest Syndrome | 1.10E-06 | 4.02E-05 | 0 | 0 | 201.606061 |
| ovarian neoplasm | 1.25E-06 | 4.52E-05 | 0 | 0 | 20.4672395 |
| Steatohepatitis | 1.28E-06 | 4.53E-05 | 0 | 0 | 25.8743339 |
| Malignant neoplasm of ovary | 1.38E-06 | 4.81E-05 | 0 | 0 | 16.0357957 |
| Degenerative polyarthritis | 1.64E-06 | 5.64E-05 | 0 | 0 | 19.625387 |
| Coronary Artery Disease | 1.69E-06 | 5.75E-05 | 0 | 0 | 19.5195072 |
| EAR, PATELLA, SHORT STATURE SYNDROME | 1.92E-06 | 6.43E-05 | 0 | 0 | 164.900826 |
| Non-alcoholic Fatty Liver Disease | 2.23E-06 | 7.18E-05 | 0 | 0 | 33.193178 |
| Septic Shock | 2.27E-06 | 7.18E-05 | 0 | 0 | 155.462338 |
| Lipoid nephrosis | 2.27E-06 | 7.18E-05 | 0 | 0 | 155.462338 |
| Lymphatic Metastasis | 2.31E-06 | 7.18E-05 | 0 | 0 | 57.5304348 |
| Arthritis | 2.31E-06 | 7.18E-05 | 0 | 0 | 23.2716346 |
| Esophageal Neoplasms | 2.46E-06 | 7.56E-05 | 0 | 0 | 23.0051506 |
| Colorectal Carcinoma | 2.56E-06 | 7.74E-05 | 0 | 0 | 14.6054433 |
| Hematological Disease | 2.65E-06 | 7.92E-05 | 0 | 0 | 55.5048951 |
| Uterine Fibroids | 2.77E-06 | 8.16E-05 | 0 | 0 | 31.7215762 |
| Colorectal Neoplasms | 3.09E-06 | 8.99E-05 | 0 | 0 | 17.7485929 |
| Non-Small Cell Lung Carcinoma | 3.26E-06 | 9.28E-05 | 0 | 0 | 14.3033124 |
| Neoplasm Metastasis | 3.27E-06 | 9.28E-05 | 0 | 0 | 15.0803274 |
| Impaired cognition | 3.33E-06 | 9.33E-05 | 0 | 0 | 21.7906015 |
| Malignant neoplasm of esophagus | 3.38E-06 | 9.38E-05 | 0 | 0 | 21.7230135 |
| Liver Cirrhosis | 3.69E-06 | 9.97E-05 | 0 | 0 | 21.3910635 |
| MYELODYSPLASTIC SYNDROME | 3.69E-06 | 9.97E-05 | 0 | 0 | 21.3910635 |
| Esophageal carcinoma | 3.75E-06 | 0.00010019 | 0 | 0 | 21.3258468 |
| Central neuroblastoma | 4.12E-06 | 0.00010809 | 0 | 0 | 14.8463874 |
| Idiopathic Pulmonary Fibrosis | 4.14E-06 | 0.00010809 | 0 | 0 | 29.1325015 |
| Chronic Kidney Diseases | 4.19E-06 | 0.00010824 | 0 | 0 | 29.0533333 |
| Irritable Bowel Syndrome | 4.40E-06 | 0.00011225 | 0 | 0 | 48.6453988 |
| Malignant neoplasm of urinary bladder | 4.73E-06 | 0.00011944 | 0 | 0 | 16.5778364 |
| Thromboangiitis Obliterans | 4.94E-06 | 0.00012323 | 0 | 0 | 118.221344 |
| Neuroblastoma | 5.00E-06 | 0.00012354 | 0 | 0 | 14.434714 |
| Giant Cell Tumors | 5.25E-06 | 0.00012508 | 0 | 0 | 115.700193 |
| Cervical Squamous Intraepithelial Neoplasia | 5.25E-06 | 0.00012508 | 0 | 0 | 115.700193 |
| Carcinoma of bladder | 5.25E-06 | 0.00012508 | 0 | 0 | 16.3038961 |
| Adenocarcinoma | 5.32E-06 | 0.00012508 | 0 | 0 | 14.3051643 |
| Multiple malignancy | 5.42E-06 | 0.00012508 | 0 | 0 | 46.0790698 |
| Carcinomatosis | 5.42E-06 | 0.00012508 | 0 | 0 | 46.0790698 |
| Vascular Diseases | 5.45E-06 | 0.00012508 | 0 | 0 | 27.483165 |
| Mammary Neoplasms | 5.52E-06 | 0.00012537 | 0 | 0 | 13.3281749 |

**Table S4. Top 100 GWAS catalog enriched entries for core genes**

| Term | P-value | Adjusted P-value | Old P-value | Old Adjusted P-value | Odds Ratio |
| --- | --- | --- | --- | --- | --- |
| Cytokine Network Levels (Multivariate Analysis) | 1.63E-05 | 0.00240622 | 0 | 0 | 475.690476 |
| Inflammatory Biomarkers (Multivariate Analysis) | 2.49E-05 | 0.00240622 | 0 | 0 | 369.944444 |
| Thyroid Stimulating Hormone Levels | 3.99E-05 | 0.00256877 | 0 | 0 | 57.1033493 |
| Thyroid Hormone Levels | 0.00014646 | 0.00706688 | 0 | 0 | 138.625 |
| Prostate-Specific Antigen Levels | 0.00033221 | 0.01282322 | 0 | 0 | 89.8603604 |
| Hypothyroidism | 0.00073547 | 0.01898401 | 0 | 0 | 59.3154762 |
| Body Size At Age 10 | 0.00078473 | 0.01898401 | 0 | 0 | 20.2187286 |
| Fasting Insulin | 0.0007869 | 0.01898401 | 0 | 0 | 57.2643678 |
| Triglyceride Levels In Current Drinkers | 0.0011309 | 0.02241505 | 0 | 0 | 47.4190476 |
| Medication Use (Calcium Channel Blockers) | 0.0011623 | 0.02241505 | 0 | 0 | 46.7488263 |
| Triglyceride Levels X Alcohol Consumption (Drinkers Vs Non-Drinkers) Interaction (2Df) | 0.0013255 | 0.02241505 | 0 | 0 | 43.6622807 |
| Triglyceride Levels X Alcohol Consumption (Reg Vs Non-Reg Drinkers) Interaction (2Df) | 0.00139368 | 0.02241505 | 0 | 0 | 42.5384615 |
| Hdl Levels In Current Drinkers | 0.00216577 | 0.03215328 | 0 | 0 | 33.8231293 |
| Hdl Levels X Alcohol Consumption (Reg Vs Non-Reg Drinkers) Interaction (2Df) | 0.00270667 | 0.0328546 | 0 | 0 | 30.1151515 |
| Hdl Levels X Alcohol Consumption (Drinkers Vs Non-Drinkers) Interaction (2Df) | 0.00304866 | 0.0328546 | 0 | 0 | 28.3034188 |
| Cryptococcosis In Hiv Infection | 0.0034954 | 0.0328546 | 0 | 0 | 384.269231 |
| Amyotrophic Lateral Sclerosis (C9Orf72 Mutation Interaction) | 0.0034954 | 0.0328546 | 0 | 0 | 384.269231 |
| Dysmenorrheic Pain Severity | 0.0034954 | 0.0328546 | 0 | 0 | 384.269231 |
| Body Mass Index And Coronary Artery Disease (Pairwise) | 0.0034954 | 0.0328546 | 0 | 0 | 384.269231 |
| Serum Uric Acid Levels | 0.00407365 | 0.0328546 | 0 | 0 | 24.3259804 |
| Osteoarthritis Biomarkers | 0.00419312 | 0.0328546 | 0 | 0 | 307.4 |
| Cytokine Levels | 0.00419312 | 0.0328546 | 0 | 0 | 307.4 |
| Sensory Disturbances After Bilateral Sagittal Split Ramus Osteotomy | 0.00419312 | 0.0328546 | 0 | 0 | 307.4 |
| Liver Enzyme Levels (Alanine Transaminase) | 0.00424826 | 0.0328546 | 0 | 0 | 23.7973621 |
| Plasma Thyroid-Stimulating Hormone Levels | 0.00489039 | 0.0328546 | 0 | 0 | 256.153846 |
| Waist Circumference Adjusted For Bmi In Inactive Individuals | 0.00489039 | 0.0328546 | 0 | 0 | 256.153846 |
| Triglycerides | 0.00549974 | 0.0328546 | 0 | 0 | 20.7830189 |
| Hyperthyroidism | 0.0055872 | 0.0328546 | 0 | 0 | 219.549451 |
| Body Fat Percentage And Triglycerides (Pairwise) | 0.0055872 | 0.0328546 | 0 | 0 | 219.549451 |
| Body Fat Percentage And Hdl-C (Pairwise) | 0.0055872 | 0.0328546 | 0 | 0 | 219.549451 |
| Impulsivity (Motor) | 0.0055872 | 0.0328546 | 0 | 0 | 219.549451 |
| High Density Lipoprotein Cholesterol Levels | 0.00576807 | 0.0328546 | 0 | 0 | 20.2689162 |
| Pagets Disease | 0.00628356 | 0.0328546 | 0 | 0 | 192.096154 |
| Cardiovascular Risk Factors (Age Interaction) | 0.00628356 | 0.0328546 | 0 | 0 | 192.096154 |
| Early Age-Related Macular Degeneration | 0.00628356 | 0.0328546 | 0 | 0 | 192.096154 |
| Diffuse Cutaneous Systemic Sclerosis | 0.00628356 | 0.0328546 | 0 | 0 | 192.096154 |
| Diastolic Bp | 0.00679139 | 0.0328546 | 0 | 0 | 9.25651621 |
| Body Mass Index And Hdl-C (Pairwise) | 0.00697947 | 0.0328546 | 0 | 0 | 170.74359 |
| Voxel-Wise Structural Brain Imaging Measurements In Alzheimers Disease | 0.00697947 | 0.0328546 | 0 | 0 | 170.74359 |
| Body Mass Index And Triglycerides (Pairwise) | 0.00697947 | 0.0328546 | 0 | 0 | 170.74359 |
| Gestational Age At Birth (Child Effect) | 0.00697947 | 0.0328546 | 0 | 0 | 170.74359 |
| Kidney Volume | 0.00767493 | 0.03444795 | 0 | 0 | 153.661538 |
| Lactate Dehydrogenase Levels | 0.00767493 | 0.03444795 | 0 | 0 | 153.661538 |
| Sexual Dimorphism In Anthropometric Traits | 0.00906449 | 0.03803144 | 0 | 0 | 128.038462 |
| Interleukin-10 Levels | 0.00906449 | 0.03803144 | 0 | 0 | 128.038462 |
| Vascular Endothelial Growth Factor Levels | 0.00906449 | 0.03803144 | 0 | 0 | 128.038462 |
| Obesity-Related Traits | 0.00979809 | 0.04004616 | 0 | 0 | 8.0617181 |
| Hdl Cholesterol | 0.00995967 | 0.04004616 | 0 | 0 | 15.1835637 |
| Cerebrospinal Ab1-42 Levels In Alzheimers Disease Dementia | 0.01045224 | 0.04116903 | 0 | 0 | 109.736264 |
| Birth Weight | 0.01272914 | 0.04814925 | 0 | 0 | 13.3191633 |
| Hip Index | 0.01282668 | 0.04814925 | 0 | 0 | 13.2647849 |
| Urate Levels | 0.01302275 | 0.04814925 | 0 | 0 | 13.1573333 |
| Perceived Unattractiveness To Mosquitoes | 0.01322233 | 0.04814925 | 0 | 0 | 85.3333333 |
| Feeling Guilty | 0.01391373 | 0.04972871 | 0 | 0 | 80.8380567 |
| Plasma Omega-6 Polyunsaturated Fatty Acid Levels (Dihomo-Gamma-Linolenic Acid) | 0.01529518 | 0.05271374 | 0 | 0 | 73.1318681 |
| Hyperuricemia | 0.01529518 | 0.05271374 | 0 | 0 | 73.1318681 |
| Waist-To-Hip Ratio Adjusted For Bmi X Sex Interaction | 0.01667483 | 0.05646038 | 0 | 0 | 66.7658863 |
| Triglyceride Levels X Long Total Sleep Time Interaction (2Df Test) | 0.01874094 | 0.06236208 | 0 | 0 | 59.0532544 |
| Feeling Fed-Up | 0.01942874 | 0.06355504 | 0 | 0 | 56.8632479 |
| Waist-To-Hip Ratio Adjusted For Bmi In Non-Smokers | 0.02148948 | 0.06676468 | 0 | 0 | 51.1692308 |
| Waist-To-Hip Ratio Adjusted For Bmi ( Main Effects And Smoking Interaction) | 0.02148948 | 0.06676468 | 0 | 0 | 51.1692308 |
| Diabetic Retinopathy | 0.02148948 | 0.06676468 | 0 | 0 | 51.1692308 |
| Irritable Mood | 0.0221755 | 0.06676468 | 0 | 0 | 49.516129 |
| Cutaneous Squamous Cell Carcinoma | 0.02286107 | 0.06676468 | 0 | 0 | 47.9663462 |
| Eosinophilic Esophagitis | 0.02354619 | 0.06676468 | 0 | 0 | 46.5104895 |
| Aspartate Aminotransferase Levels | 0.02367327 | 0.06676468 | 0 | 0 | 9.51647287 |
| Intraocular Pressure | 0.02405742 | 0.06676468 | 0 | 0 | 9.43275696 |
| Hdl Levels X Short Total Sleep Time Interaction (2Df Test) | 0.02423087 | 0.06676468 | 0 | 0 | 45.1402715 |
| Total Body Bone Mineral Density | 0.02491511 | 0.06676468 | 0 | 0 | 43.8483516 |
| Experiencing Mood Swings | 0.02559889 | 0.06676468 | 0 | 0 | 42.6282051 |
| Left-Handedness | 0.02559889 | 0.06676468 | 0 | 0 | 42.6282051 |
| T2D (Age Of Onset) | 0.02559889 | 0.06676468 | 0 | 0 | 42.6282051 |
| Glomerular Filtration Rate In Non Diabetics (Creatinine) | 0.02559889 | 0.06676468 | 0 | 0 | 42.6282051 |
| Medication Use (Beta Blocking Agents) | 0.02559889 | 0.06676468 | 0 | 0 | 42.6282051 |
| Monocyte Percentage Of White Cells | 0.02628327 | 0.06763562 | 0 | 0 | 8.98443223 |
| Cerebrospinal P-Tau181P Levels | 0.02696513 | 0.06847725 | 0 | 0 | 40.3805668 |
| Creatine Kinase Levels | 0.02764759 | 0.06921028 | 0 | 0 | 39.3431953 |
| Polycystic Ovary Syndrome | 0.0283296 | 0.06921028 | 0 | 0 | 38.3576923 |
| Periventricular White Matter Hyperintensities | 0.0283296 | 0.06921028 | 0 | 0 | 38.3576923 |
| Reticulocyte Fraction Of Red Cells | 0.0295646 | 0.07074827 | 0 | 0 | 8.41838488 |
| Epstein-Barr Virus Copy Number In Lymphoblastoid Cell Lines | 0.02969228 | 0.07074827 | 0 | 0 | 36.5274725 |
| Waist-To-Hip Ratio Adjusted For Bmi In Active Individuals | 0.03105319 | 0.07273929 | 0 | 0 | 34.8636364 |
| Reticulocyte Count | 0.03184012 | 0.07273929 | 0 | 0 | 8.07838284 |
| A Body Shape Index | 0.0321294 | 0.07273929 | 0 | 0 | 8.03776683 |
| Monocyte Count | 0.03227445 | 0.07273929 | 0 | 0 | 8.01760852 |
| Serum Total Protein Levels | 0.03241233 | 0.07273929 | 0 | 0 | 33.3444816 |
| Hippocampal Volume In Alzheimers Disease Dementia | 0.03376969 | 0.0746978 | 0 | 0 | 31.9519231 |
| High Light Scatter Reticulocyte Percentage Of Red Cells | 0.03463114 | 0.0746978 | 0 | 0 | 7.70803783 |
| Diastolic Bp (Cigarette Smoking Interaction) | 0.03580243 | 0.0746978 | 0 | 0 | 30.0678733 |
| Iron Status Biomarkers (Ferritin Levels) | 0.03580243 | 0.0746978 | 0 | 0 | 30.0678733 |
| High Light Scatter Reticulocyte Count | 0.03644248 | 0.0746978 | 0 | 0 | 7.4908046 |
| Mean Arterial Pressure X Alcohol Consumption Interaction (2Df Test) | 0.03647913 | 0.0746978 | 0 | 0 | 29.4881657 |
| Adiponectin Levels | 0.03647913 | 0.0746978 | 0 | 0 | 29.4881657 |
| Childhood Body Mass Index | 0.03715538 | 0.0746978 | 0 | 0 | 28.9303338 |
| Waist-To-Hip Ratio Adjusted For Bmi ( For Main Effect And Physical Activity Interaction) | 0.03715538 | 0.0746978 | 0 | 0 | 28.9303338 |
| Bmi In Non-Smokers | 0.03715538 | 0.0746978 | 0 | 0 | 28.9303338 |
| Systolic Bp (Cigarette Smoking Interaction) | 0.03850657 | 0.07616046 | 0 | 0 | 27.8755245 |
| Anorexia Nervosa | 0.0391815 | 0.07616046 | 0 | 0 | 27.3763736 |
| Body Mass Index (Agegreater Than50) | 0.03985599 | 0.07616046 | 0 | 0 | 26.8947368 |
| Blood Protein Levels In Cardiovascular Risk | 0.03985599 | 0.07616046 | 0 | 0 | 26.8947368 |
